# Supplementary material
Source: HighWire-hosted journal article supplement (https://gut.bmj.com/content/gutjnl-2018-317856)
Supplement: inline-supplementary-material-6 [file inline-supplementary-material-6.xlsx]

## Sheet: Hallmark_Signatures_Activated
NAME	GS<br> follow link to MSigDB	GS DETAILS	SIZE	ES	NES	NOM p-val	FDR q-val	FWER p-val	RANK AT MAX	LEADING EDGE
HALLMARK_MYC_TARGETS_V2	HALLMARK_MYC_TARGETS_V2	Details ...	58	0.736083	2.27273	0	0	0	4433	tags=76%, list=19%, signal=93%
HALLMARK_MYC_TARGETS_V1	HALLMARK_MYC_TARGETS_V1	Details ...	200	0.586188	2.13263	0	0	0	6232	tags=62%, list=27%, signal=83%
HALLMARK_E2F_TARGETS	HALLMARK_E2F_TARGETS	Details ...	200	0.495042	1.80699	0	0.000346496	0.003	5578	tags=52%, list=24%, signal=68%
HALLMARK_UNFOLDED_PROTEIN_RESPONSE	HALLMARK_UNFOLDED_PROTEIN_RESPONSE	Details ...	113	0.440078	1.49187	0.00574713	0.0122495	0.129	3508	tags=38%, list=15%, signal=45%
HALLMARK_MTORC1_SIGNALING	HALLMARK_MTORC1_SIGNALING	Details ...	200	0.399181	1.45856	0.00194932	0.0141899	0.18	3629	tags=30%, list=16%, signal=35%
HALLMARK_G2M_CHECKPOINT	HALLMARK_G2M_CHECKPOINT	Details ...	200	0.37611	1.36364	0.00604839	0.0325795	0.42	5578	tags=44%, list=24%, signal=57%
HALLMARK_WNT_BETA_CATENIN_SIGNALING	HALLMARK_WNT_BETA_CATENIN_SIGNALING	Details ...	42	0.438208	1.27986	0.108384	0.0637458	0.729	3755	tags=33%, list=16%, signal=40%
HALLMARK_SPERMATOGENESIS	HALLMARK_SPERMATOGENESIS	Details ...	134	0.298278	1.03028	0.353175	0.413684	1	5555	tags=28%, list=24%, signal=36%
HALLMARK_ANGIOGENESIS	HALLMARK_ANGIOGENESIS	Details ...	36	0.281799	0.778042	0.854932	0.9652	1	154	tags=6%, list=1%, signal=6%

## Sheet: SUMO_Signatures_Activated
NAME	GS<br> follow link to MSigDB	GS DETAILS	SIZE	ES	NES	NOM p-val	FDR q-val	FWER p-val	RANK AT MAX	LEADING EDGE
SUMOYLATION OF RNA BINDING PROTEINS	SUMOYLATION OF RNA BINDING PROTEINS	Details ...	41	0.659246	1.88255	0	0.00150451	0.001	4888	tags=61%, list=21%, signal=77%
SUMOYLATION OF DNA DAMAGE RESPONSE AND REPAIR PROTEINS	SUMOYLATION OF DNA DAMAGE RESPONSE AND REPAIR PROTEINS	Details ...	69	0.571442	1.79368	0	0.00225677	0.003	6242	tags=67%, list=27%, signal=91%
GO_PROTEIN_SUMOYLATION	GO_PROTEIN_SUMOYLATION	Details ...	115	0.514369	1.7539	0	0.00224005	0.005	5136	tags=51%, list=22%, signal=65%
SUMOYLATION OF CHROMATIN ORGANIZATION PROTEINS	SUMOYLATION OF CHROMATIN ORGANIZATION PROTEINS	Details ...	64	0.561427	1.72333	0	0.00205617	0.006	2463	tags=34%, list=11%, signal=38%
SUMOYLATION OF DNA REPLICATION PROTEINS	SUMOYLATION OF DNA REPLICATION PROTEINS	Details ...	41	0.54915	1.56562	0.017341	0.0131136	0.043	3399	tags=41%, list=15%, signal=48%
